# Supplementary material for: Quorum sensing inhibiting dihydropyrrol-2-ones embedded polymer/graphene oxide nanocomposite waterborne antimicrobial coatings
Source: Royal Society of Chemistry journal article supplement (doi:10.1039/d4tb01026d), 2024-01-01
Supplement: d4tb01026d1.pdf [file d4tb01026d1.pdf]

## Quorum sensing inhibiting dihydropyrrol-2-ones embedded polymer/graphene oxide nanocomposite waterborne antimicrobial coatings

Renxun Chen,<sup>1,\*</sup> Namrata Maslekar,<sup>2</sup> Sudip Chakraborty,<sup>1</sup> Le N. M. Dinh,<sup>2</sup> Yin Yao,<sup>3</sup> Per Zetterlund,<sup>2</sup> Naresh Kumar,<sup>1</sup> Vipul Agarwal<sup>2,\*</sup>

<sup>1</sup>School of Chemistry, University of New South Wales (UNSW) Sydney, Sydney 2052, Australia

<sup>2</sup>Cluster for Advanced Macromolecular Design (CAMD), School of Chemical Engineering, University of New South Wales, Sydney, NSW 2052, Australia

<sup>3</sup>Mark Wainwright Analytical Centre, University of New South Wales, Sydney, NSW 2052, Australia

Corresponding authors: r.chen@unsw.edu.au, agarwalvipul84@gmail.com

### Supporting Information

**Table S1.** Characterisation of synthesised polymers using the two polymerisation methods

| P(St- <i>stat</i> - <i>n</i> BA) synthesis method | Monomer conversion | Intensity average particle size DLS (PDI) | $M_n$ (g/mol)       | $M_w$ (g/mol)       | $\bar{D}$ |
|---------------------------------------------------|--------------------|-------------------------------------------|---------------------|---------------------|-----------|
| Soap-free emulsion polymerisation                 | 97%                | 519 nm (0.058)                            | $10.27 \times 10^5$ | $34.22 \times 10^5$ | 3.33      |
| Miniemulsion polymerisation                       | 95%                | 337 nm (0.33)                             | $2.4 \times 10^4$   | $7.18 \times 10^4$  | 2.98      |

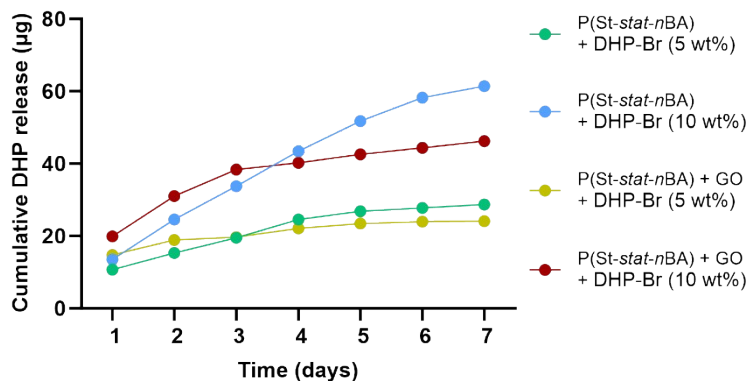

**Figure S1.** Release study showing the release profile of DHP-Br from different physical mixing coatings.

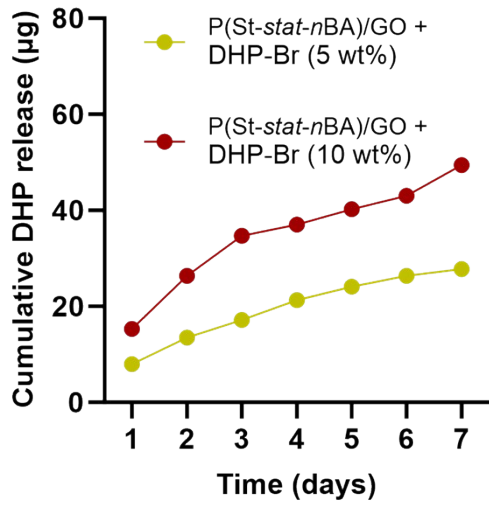

Figure S2. Release study showing the release profile of DHP-Br from different miniemulsion coatings.

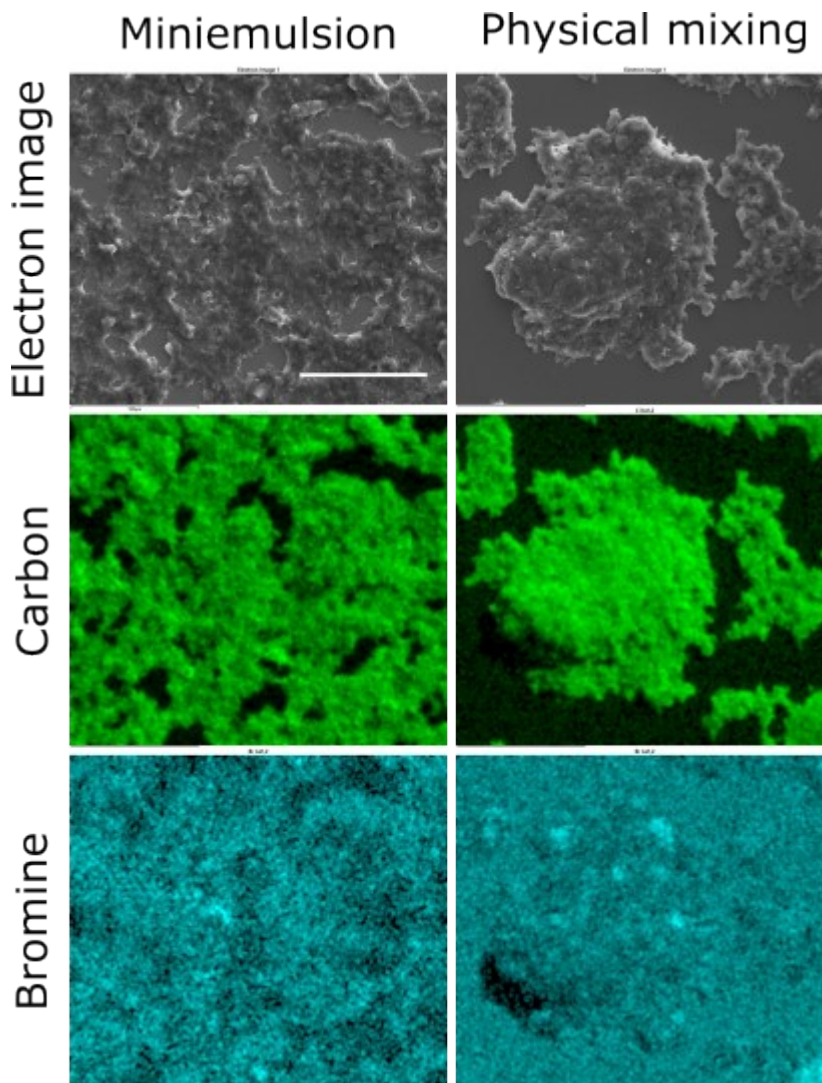

**Figure S3.** EDS mapping on SEM of P(*St-stat-nBA*)/GO/DHP-Br (5 wt%) prepared using the two methods (miniemulsion and physical mixing) showing the presence and distribution of carbon and bromine (from DHP-Br) and the corresponding electron image. Scale bar = 100  $\mu\text{m}$ .

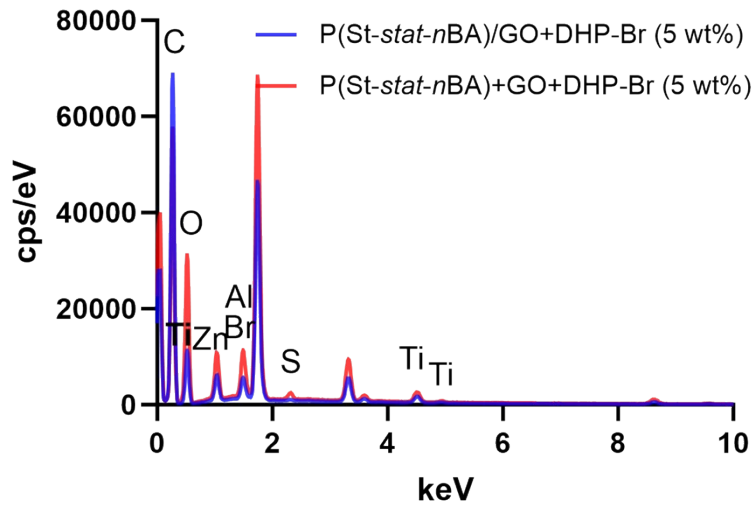

**Figure S4.** SEM-EDS spectra of the mapped images of miniemulsion P(*St-stat-nBA*)/GO+DHP-Br (5 wt%) and physical mixed P(*St-stat-nBA*)+GO+DHP-Br (5 wt%) coatings showing the presence of carbon and bromine (from DHP-Br).
